# Supplementary material
Source: Elsevier journal article supplement (https://www.sciencedirect.com/science/article/pii/S0021755718309860)
Supplement: mmc1 [file S0021755718309860:mmc1.docx]

JPED-2018-916 _ Material Suplementar

**QUESTIONÁRIO SOBRE HÁBITOS DE USO DE MÍDIAS INTERATIVAS**

**Este questionário se refere ao modo como você e sua criança utilizam as mídias interativas (por exemplo, smartphone, tablet). Por favor, responda todas as questões. Se você não tiver certeza sobre qual resposta dar em uma questão, por favor, escolha dentre as alternativas a que lhe parece mais apropriada.**

Nome da criança: __________________________________________________

Data de nascimento: __/___/___

Nome da mãe:____________________________________________________________

Idade da mãe:______

Escolaridade da mãe:________

Nome do pai:___________________________________

Idade do pai:_______

Escolaridade do pai: _________

Telefone fixo:____________________

Telefone celular: __________________Operadora: ___________

Escola:_________________________________

Sobre as Mídias Interativas

1. Você conhece algum tipo de mídia interativa móvel, queremos dizer, Smartphones, Tablets?

( ) Não ( ) Sim

2. Você possui algum tipo de mídia interativa móvel?

( ) Não ( ) Sim Qual? ___________________________________

3. Sua criança possui ou tem acesso a algum tipo de mídia interativa móvel em casa?

( ) Não ( ) Sim

3.1 Qual (is)?

( ) Smartphone

| Há quanto tempo iniciou? _____________________________________________. | | | |
| --- | --- | --- | --- |
| Tempo diário de uso atual: _____________________ minutos (estimativa) | | | |
| ( ) | | Tablet | |
|  | |  | Há quanto tempo iniciou?  _____________________________________________. |
|  | |  | Tempo diário de uso atual: _____________________ minutos (estimativa) |

4. O que seu filho (a) faz com as mídias interativas?

( ) Vê vídeos ( ) Escuta música ( ) Joga games

( ) Vê estórias ( ) É utilizado como aplicativo educacional

Outros________________________________________________________________

5. O que seu filho mais gosta de fazer quando está utilizando as mídias interativas? (MARQUE APENAS UMA OPÇÃO)

( ) Vê vídeos ( ) Escuta música ( ) Joga games

( ) Vê estórias ( ) É utilizado como aplicativo educacional

Outros________________________________________________________________

6. De que maneira seu filho utiliza a(s) mídias interativas (Smartphones, Tablets)?

( ) Sozinho ( ) Acompanhado pelos pais ou responsáveis ( ) Acompanhado por outra criança

( ) Outros ________________________________

7. Os pais:

| - limitam o tempo de uso? | ( ) | Não | ( ) | Sim. Como?______________ |
| --- | --- | --- | --- | --- |
| - estimulam a criança durante o uso?  (brincam e interagem juntos) | ( ) | Não | ( ) | Sim. Como?_______________ |
| - limitam conteúdo INADEQUADO para a idade? | ( ) | Não | ( ) | Sim. Qual conteúdo?________ |

8. Tem acesso a mídias interativas na escola?

| ( ) | Não | ( ) | Sim. ( ) Não sei  Qual (is)?______________________________________________________  Por quanto tempo diário?__________________________________________  Qual conteúdo?__________________________________________________ |
| --- | --- | --- | --- |

9. Você permite o acesso da sua criança à mídia interativa para:

( ) distraí-la quando estão em local público.

( ) distraí-la quando estão em casa.

( ) estimular o seu desenvolvimento.

( ) outros:___________________________________________________

10. O que você pensa sobre o efeito da utilização da mídia interativa pela sua criança no seu desenvolvimento:

( ) Benéfico, porque_______________________________________________________

( ) Prejudicial, porque_____________________________________________________

( ) Não possui opinião sobre o assunto ou desconhece.

11. Sua criança realiza atividade recreativa ou física?

| ( ) | Não | ( ) | Sim. Com que frequência?________________________ |
| --- | --- | --- | --- |

***Outros comentários****:*

__________________________________________________________________________

__________________________________________________________________________

**Figura Suplementar - Desenho e fluxo dos participantes do estudo.**

Responderam ao Questionário

(n = 253)

Excluídos (n = 84)

- Não usavam mídia interativa (n = 62)
- Respostas incompletas no questionário (n = 22)

Usam mídia interativa e questionário completo

(n = 169)

Elegíveis
(n = 275)

Excluídos (n = 66)

- Possuem Transtorno do Espectro Autista (n = 2)
- Não realizarem o Bayley III (n = 64)

Usam mídia interativa, questionário completo e Bayley III

(n = 103)

Bayley Cognitivo

(n = 71)

Bayley Linguagem

(n = 65)

Bayley Motor Fino

(n = 81)

Bayley Motor Grosso

(n = 94)

n, número de participantes.
